# Supplementary material for: Small molecule modulation of the p75 neurotrophin receptor inhibits multiple amyloid beta-induced tau pathologies
Source: PubMed Central journal article supplement (PMC7683564; doi:10.1038/s41598-020-77210-y), 2020-11-23

**Small molecule modulation of the p75 neurotrophin receptor inhibits multiple amyloid beta-induced tau pathologies**

Tao Yang<sup>a</sup>, Kevin C. Tran<sup>a,1</sup>, Anne Y. Zeng<sup>a,1</sup>, Stephen M. Massa<sup>b\*</sup>, and Frank M. Longo<sup>a\*</sup>

<sup>a</sup>Department of Neurology and Neurological Sciences, Stanford University School of Medicine, Stanford, CA 94305

<sup>b</sup>Department of Neurology, San Francisco Veterans Affairs Medical Center, and Dept. of Neurology, University of California, San Francisco, San Francisco, CA, 94121

Supplementary Data: Full length western gel images and tau transfection

### Supplementary Figure 1

kDa

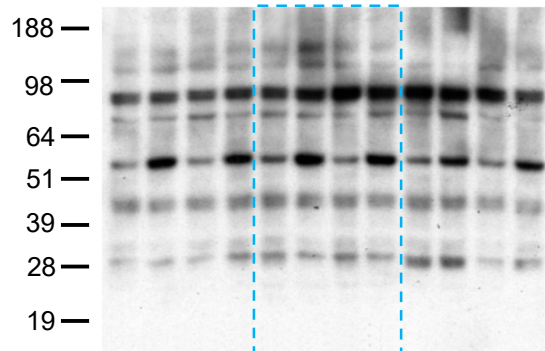

**T22**

kDa

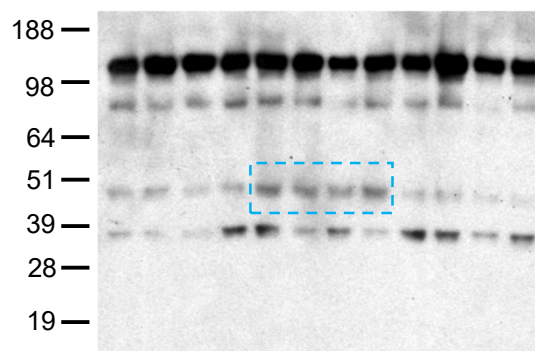

**actin**

## Supplementary Figure 2

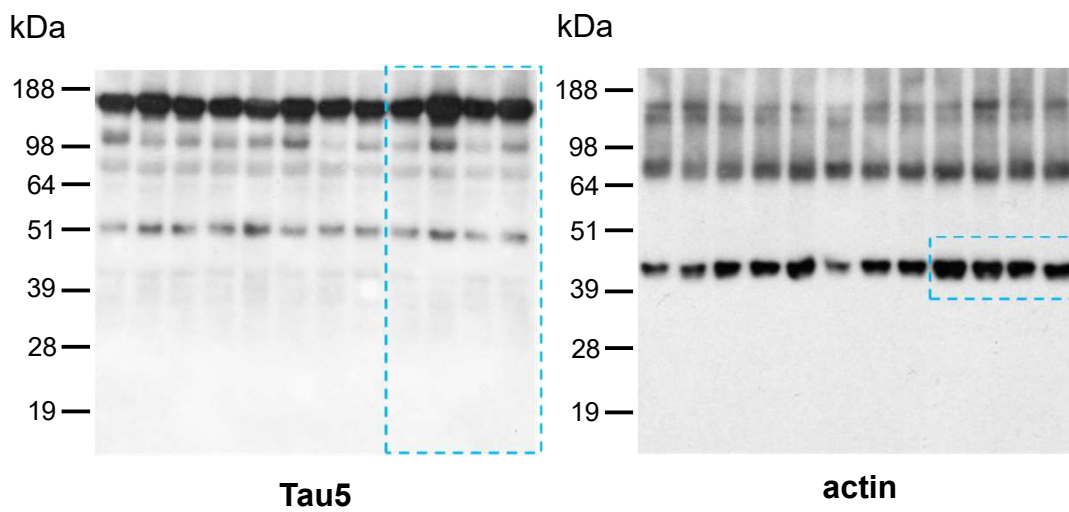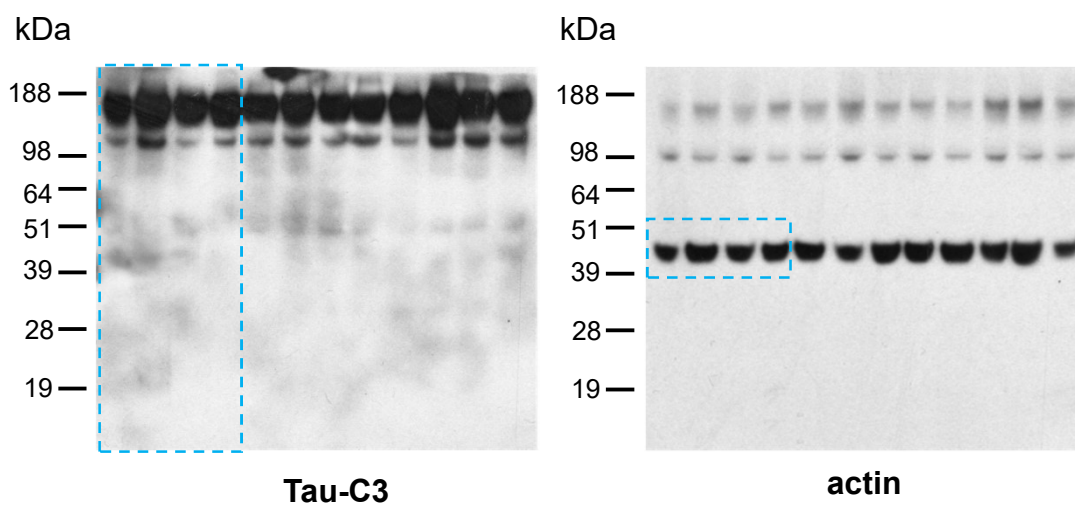

**Supplementary Figure 3**

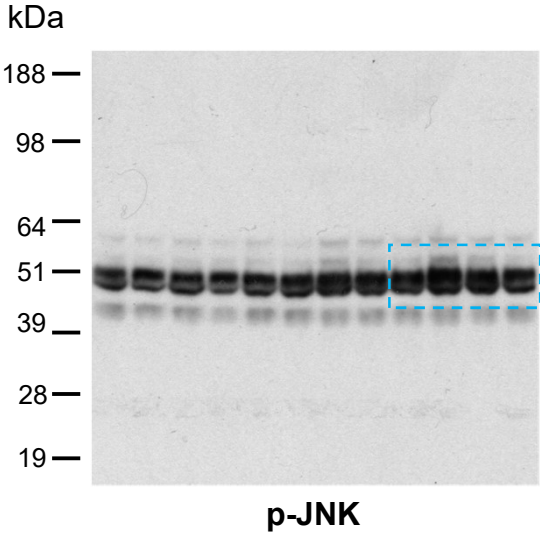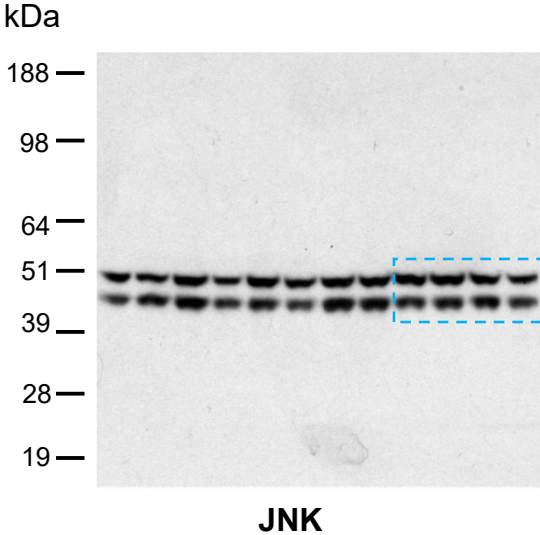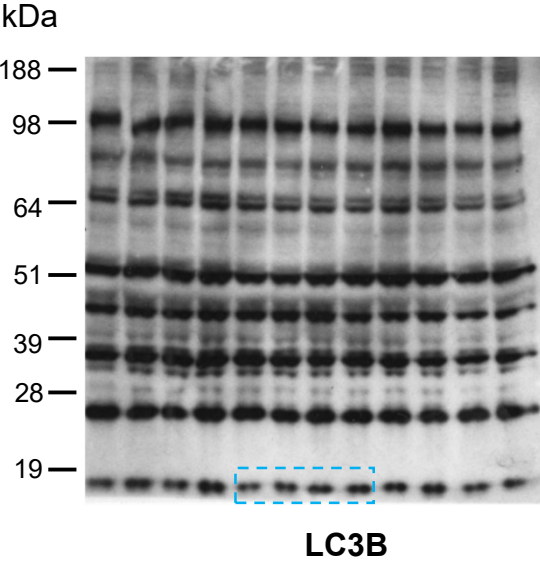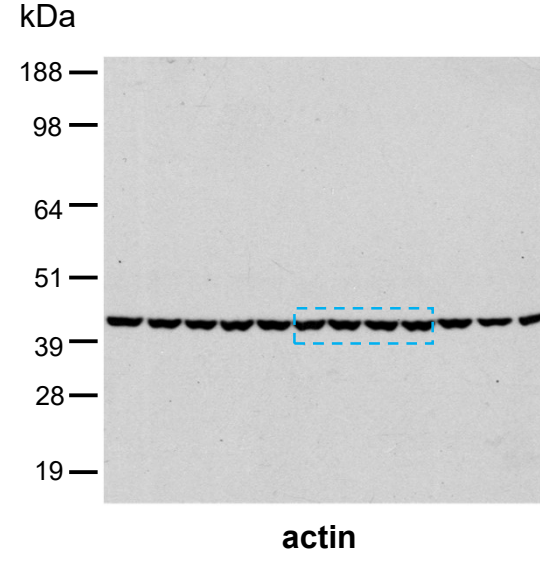

### Supplementary Figure 4

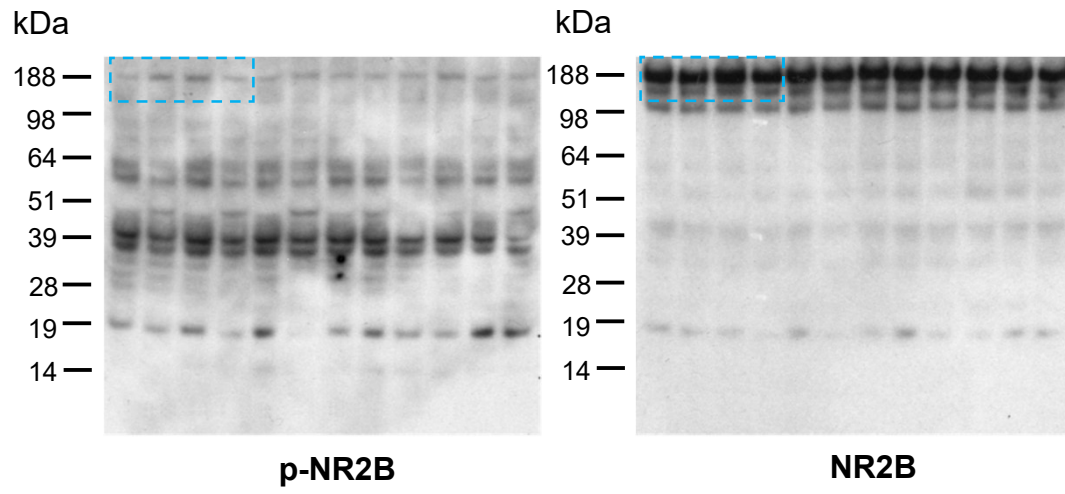



Supplementary Figure 6

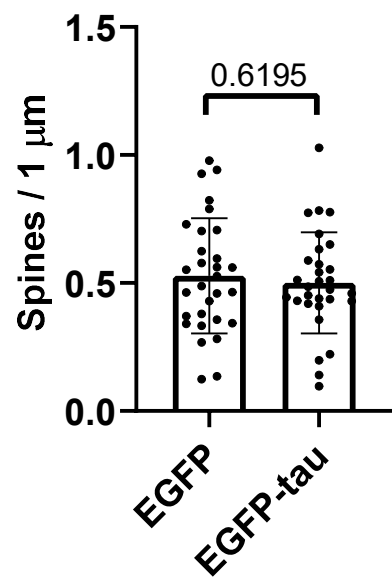

Supplement: 41598_2020_77210_MOESM1_ESM.pdf [file 41598_2020_77210_MOESM1_ESM.pdf]
